# Supplementary material
Source: PubMed Central journal article supplement (PMC4388775)
Supplement: NIHMS648570-supplement-supplement_1.pdf [file NIHMS648570-supplement-supplement_1.pdf]

**Supplemental Figure 1. Structures** are shown for (A) cromolyn (Crom), (B) flavone backbone, (C) luteolin, (lut) (D) 3',4',5,7-tetramethoxyluteolin (methlut).

**Supplemental Figure 2. Purity of methlut.** Analysis was done by mass spectrometry as detailed in the Methods.

**Supplemental Figure 3. Cromolyn loses its inhibitory effect on LAD2 cells degranulation if used as pretreatment.** MC were pre-incubated with cromolyn (100  $\mu$ M) for 30 min before stimulation with either SP (2  $\mu$ M) or anti-IgE (10  $\mu$ g/mL) for an additional 30 min. (A)  $\beta$ -hex release and (B) histamine release. NS= No statistical significance.

**Supplemental Figure 4. Methlut and lut inhibit intracellular calcium elevation.** LAD2 cells were loaded with Fura-2 AM (30 nM, 20 min) and then pre-incubated with lut or methlut (10 and 50  $\mu$ M, 30 min). Immediately after stimulation with SP (2  $\mu$ M), fura-2 fluorescence was monitored at an excitation wavelength of 340 nm and 380 nm and emission wavelength of 510 nm. Control cells were treated with 0.1% DMSO. The curve shown is representative of five experiments of similar results.

**Supplemental Figure 5. Lut and methlut do not affect intracellular ATP levels.** After incubation with lut (A) or methlut (B) (10-100  $\mu$ M, up to 24 h),  $1 \times 10^6$  LAD2 cells were lysed and intracellular ATP contents were determined.

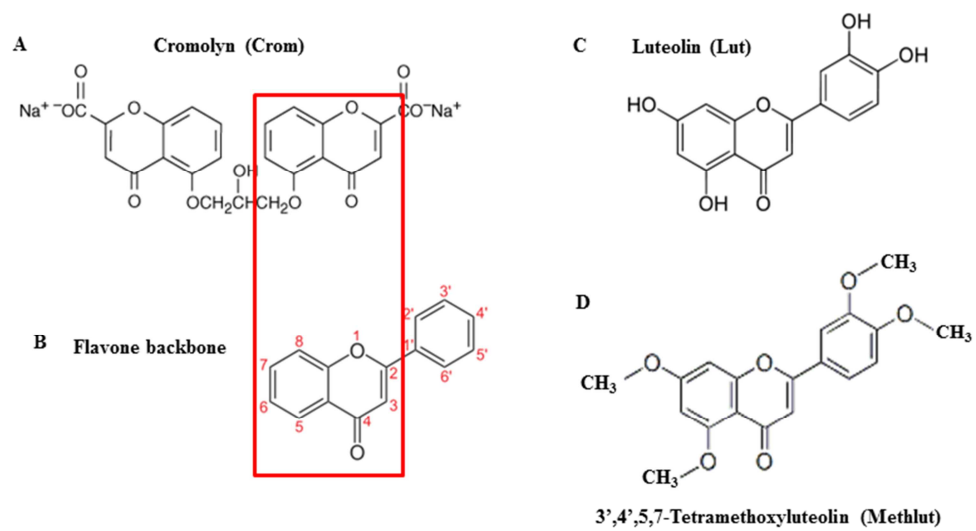

Figure 1. Supplemental

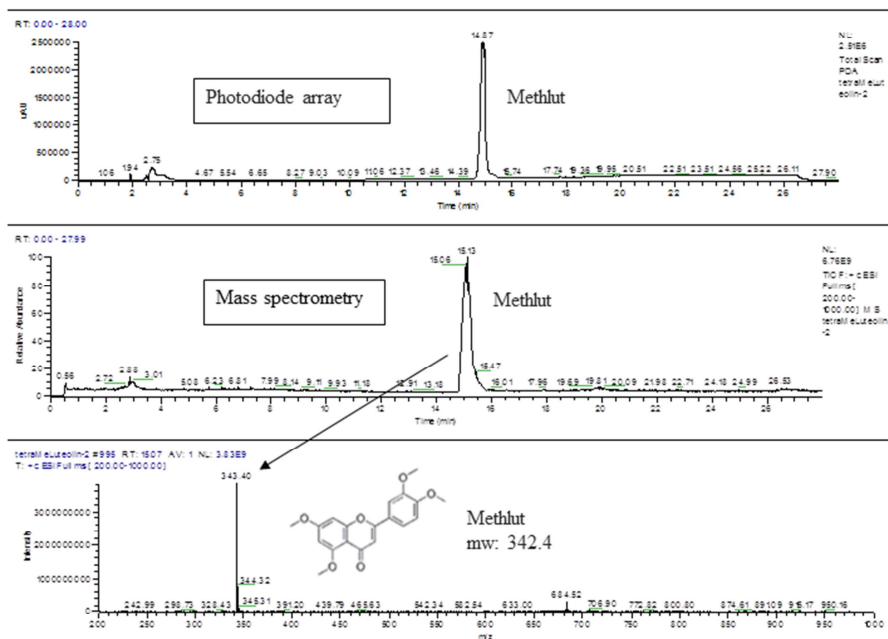

Figure 2. Supplemental

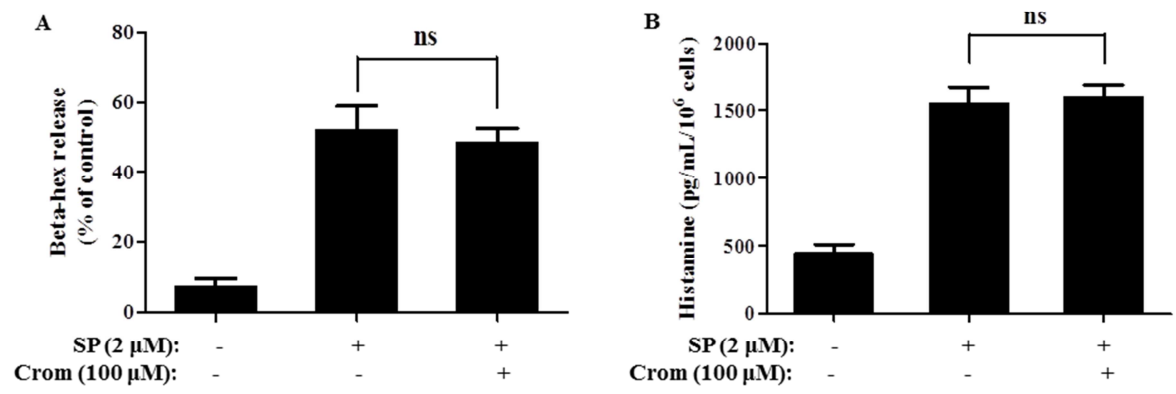

Figure 3. Supplemental

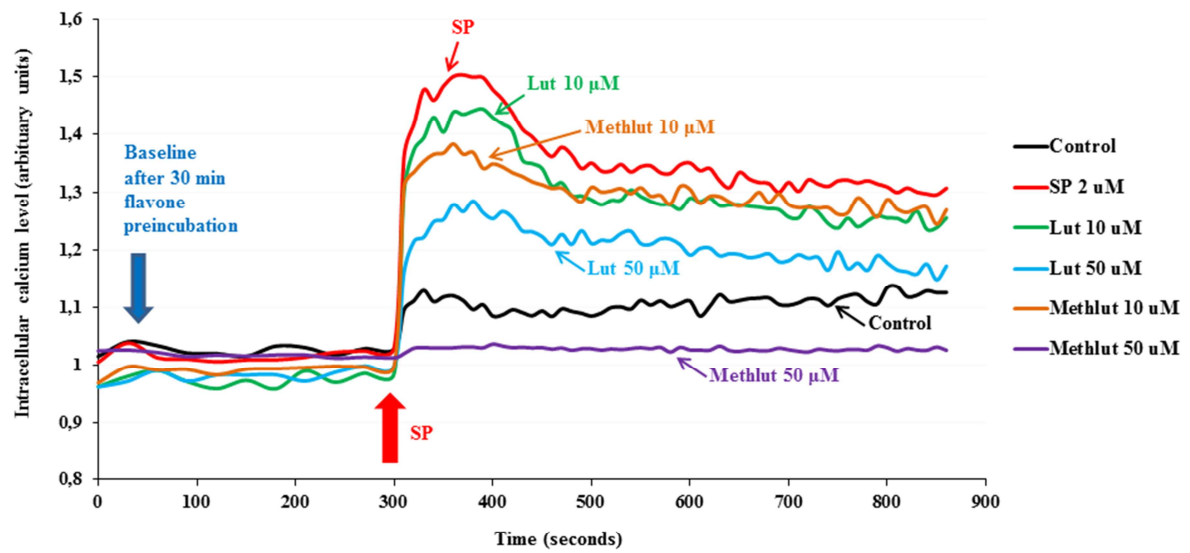

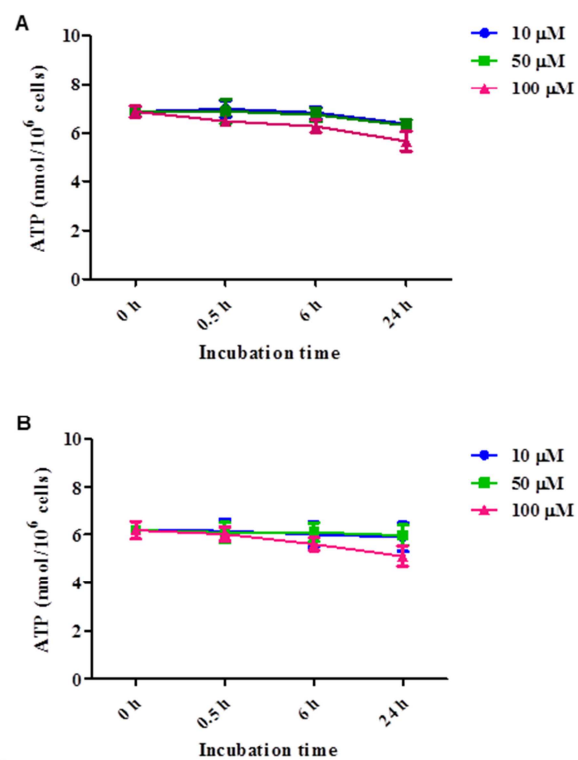

Figure 5. Supplemental
